# Supplementary material for: Randomized Controlled Trial of Two Timepoints for Introduction of Standardized Complementary Food in Preterm Infants
Source: MDPI journal article supplement (doi:10.3390/nu14030697), 2022-02-07
Supplement: s1 [file s1]

**Supplementary Materials:**  
**Table S1 : Feeding Boxes**

|                                                                                                                                                                                                                                                                                                                                                                                                                                                                                                                                                                                                                                                                                                                                                                                                                                                                                                                 |
|-----------------------------------------------------------------------------------------------------------------------------------------------------------------------------------------------------------------------------------------------------------------------------------------------------------------------------------------------------------------------------------------------------------------------------------------------------------------------------------------------------------------------------------------------------------------------------------------------------------------------------------------------------------------------------------------------------------------------------------------------------------------------------------------------------------------------------------------------------------------------------------------------------------------|
| <p><b>Starterbox: Scoop familiarization phase (7 products)</b></p> <p>Vegetables: (4 products)</p> <ul style="list-style-type: none"> <li>• parsnip</li> <li>• carrot</li> <li>• carrot and potato</li> </ul> <ul style="list-style-type: none"> <li>• mixed buttered vegetables - carrots, potatoes, peas, corn</li> </ul> <p>Fruits: (3 products)</p> <ul style="list-style-type: none"> <li>• pear</li> <li>• apple</li> <li>• banana-pear</li> </ul>                                                                                                                                                                                                                                                                                                                                                                                                                                                        |
| <p><b>complementary food box-1: from 5-12 months corrected from term (10 products)</b></p> <p>Meat from 5 months on (3 products)</p> <ul style="list-style-type: none"> <li>• parsnip with potato and veal</li> <li>• vegetable risotto with turkey</li> <li>• carrots with potato and beef</li> </ul> <p>Fruits from 5 months on (4 products)</p> <ul style="list-style-type: none"> <li>• pear-apple</li> <li>• apple-peach</li> <li>• pear-mango</li> <li>• banana-cherry</li> </ul> <p>Fruits with cereals from 5 months on (2 products)</p> <ul style="list-style-type: none"> <li>• apple-grape with rice</li> <li>• banana-peach with rice</li> </ul> <p>Cereals from 5 months on (1 product)</p> <ul style="list-style-type: none"> <li>• semolina porridge</li> </ul>                                                                                                                                  |
| <p><b>complementary food box-2: From 6-12 months corrected from term (9 products)</b></p> <p>Meat from 6 months on (3 products)</p> <ul style="list-style-type: none"> <li>• pasta with ham and cream vegetables</li> <li>• buttered vegetables with potato and chicken</li> <li>• spaghetti with cream vegetables and turkey</li> </ul> <p>Fruits from 6 months on (2 products)</p> <ul style="list-style-type: none"> <li>• peach-passion fruit</li> </ul> <ul style="list-style-type: none"> <li>• fruit smoothie - apple, banana, peach, pear</li> </ul> <p>Fruits and cereals from 6 months on (3 products)</p> <ul style="list-style-type: none"> <li>• whole grain fruit-cereal</li> <li>• banana-apple with rusk</li> <li>• apple-banana with whole grain cereal</li> </ul> <p>Milk pudding from 6 months on (1 product)</p> <ul style="list-style-type: none"> <li>• milk pulp with biscuit</li> </ul> |
| <p><b>complementary food box-3: From 7/8- 12 months corrected from term (13 products)</b></p> <p>Meat from 8 months on (3 products)</p> <ul style="list-style-type: none"> <li>• couscous with vegetables and chicken</li> <li>• vegetables with rice and turkey <ul style="list-style-type: none"> <li>• spaghetti bolognese</li> </ul> </li> </ul> <p>Fruits from 7 months on (3 products)</p>                                                                                                                                                                                                                                                                                                                                                                                                                                                                                                                |

|                                                                                                                                                                                                                                                                                                                                                                                                                                                                                                                                                                                                                                                                                                                                                                                |
|--------------------------------------------------------------------------------------------------------------------------------------------------------------------------------------------------------------------------------------------------------------------------------------------------------------------------------------------------------------------------------------------------------------------------------------------------------------------------------------------------------------------------------------------------------------------------------------------------------------------------------------------------------------------------------------------------------------------------------------------------------------------------------|
| <ul style="list-style-type: none"> <li>• peach-plum</li> <li>• apple-plum</li> </ul> <ul style="list-style-type: none"> <li>• fruit smoothie - apple, red fruits, and banana</li> </ul> <p>Fruits with yoghurt from 7 months on (3 products)</p> <ul style="list-style-type: none"> <li>• banana-pear with yoghurt</li> <li>• peach-apricot with yoghurt</li> <li>• yogurt with blueberry</li> </ul> <p>Fruits and cereals and cereal bars from 8 months on (3 products)</p> <ul style="list-style-type: none"> <li>• bear biscuits</li> <li>• yoghurt-cereal with banana-cherry</li> <li>• apple with peach and biscuit</li> </ul> <p>Night-mush from 8 months on (1 product)</p> <ul style="list-style-type: none"> <li>• porridge with apple-pear-banana-yoghurt</li> </ul> |
| <p><b>complementary food box-4: from 10-12 months corrected for term (6 products)</b></p> <p>Meat and fish from 10 months on (4 products)</p> <ul style="list-style-type: none"> <li>• spaghetti with tomato and mozzarella</li> <li>• cream vegetables with rice and turkey <ul style="list-style-type: none"> <li>• pasta in broccoli-cream</li> </ul> </li> <li>• baby paella with Alaska salmon and turkey</li> </ul> <p>Yoghurt and pudding from 10 months on (2 products)</p> <ul style="list-style-type: none"> <li>• strawberry yoghurt</li> <li>• chocolate pudding</li> </ul>                                                                                                                                                                                        |

**Table S2 :** Anthropometry of the study population during the first year of life: weight, height, head circumference, and corresponding z-scores.

|                                                        | Early Group (n = 83) | Late Group (n = 83) | p    |
|--------------------------------------------------------|----------------------|---------------------|------|
| <b>weight</b>                                          | ..                   | ..                  |      |
| birthweight in g                                       | 941 (±253)           | 932 (±256)          | 0.73 |
| weight at expected term ±14 days                       | 3249 (±444)          | 3293 (±467)         | 0.30 |
| weight with 6 weeks corrected age                      | 4654 (±662)          | 4594 (±616)         | 0.43 |
| weight with 3 months corrected age                     | 5811 (±816)          | 5782 (±739)         | 0.84 |
| weight with 6 months corrected age                     | 7351 (±1003)         | 7160 (±868)         | 0.12 |
| weight with 12 month corrected age                     | 9363 (±1375)         | 9115 (±1166)        | 0.15 |
| <b>z-scores weight</b>                                 | ..                   | ..                  | ..   |
| z-score birthweight                                    | -0.1 (±0.77)         | -0.13 (±0.79)       | 0.64 |
| z-score Weight at expected term±14 days                | -0.73 (±0.84)        | -0.54 (±0.84)       | 0.12 |
| z-score Weight with 6 weeks corrected age              | -0.47 (±1.01)        | -0.44 (±1)          | 0.15 |
| z-score Weight with 3 months corrected age             | -0.67 (±1.14)        | -0.64 (±0.95)       | 0.17 |
| z-score Weight with 6 months corrected age             | -0.49 (±1.2)         | -0.56 (±1.04)       | 0.03 |
| z-score weight with 12 month corrected age             | -0.18 (±1.31)        | -0.3 (±1.13)        | 0.06 |
| <b>height</b>                                          | ..                   | ..                  | ..   |
| birthheight in cm                                      | 34.8 (±3.1)          | 34.9 (±3.6)         | 0.91 |
| height in cm at expected term ±14 days                 | 49.1 (±2.5)          | 49.2 (±2.6)         | 0.6  |
| height in cm with 6 weeks corrected age                | 55.1 (±2.5)          | 54.6 (±2.4)         | 0.26 |
| height in cm with 3 months corrected age               | 60.4 (±2.6)          | 60.3 (±2.6)         | 0.82 |
| height in cm with 6 months corrected age               | 67 (±2.8)            | 66.3 (±2.7)         | 0.23 |
| height in cm with 12 months corrected age              | 74.7 (±2.7)          | 74.4 (±2.8)         | 0.73 |
| <b>z-scores height</b>                                 | ..                   | ..                  | ..   |
| z-score birthheight                                    | -0.01 (±1.02)        | 0.02 (±1.08)        | 0.9  |
| z-score height at expected term±14 days                | -0.93 (±0.92)        | -0.77 (±1.13)       | 0.43 |
| z-score height with 6 weeks corrected age              | -0.59 (±1.13)        | -0.66 (±1.2)        | 0.31 |
| z-score height with 3 months corrected age             | -0.34 (±1.12)        | -0.36 (±1.11)       | 0.23 |
| z-score height with 6 months corrected age             | 0 (±1.22)            | -0.1 (±1.16)        | 0.24 |
| z-score height with 12 months corrected age            | -0.31 (±1.05)        | -0.3 (±1.12)        | 0.77 |
| <b>head circumference</b>                              | ..                   | ..                  | ..   |
| head circumference in cm at birth                      | 24.8 (±2.2)          | 24.8 (±2.31)        | 0.83 |
| head circumference in cm at expected term±14 days      | 34.6 (±1.6)          | 34.9 (±1.59)        | 0.19 |
| head circumference in cm with 6 weeks corrected age    | 37.7 (±1.5)          | 37.9 (±1.47)        | 0.65 |
| head circumference in cm with 3 months corrected age   | 40 (±1.5)            | 40 (±1.39)          | 0.91 |
| head circumference in cm with 6 months corrected age   | 42.6 (±1.5)          | 42.6 (±1.54)        | 0.70 |
| head circumference in cm with 12 months corrected age  | 45.4 (±1.8)          | 45.5 (±1.6)         | 0.62 |
| <b>z-score head circumference</b>                      | ..                   | ..                  | ..   |
| z-score head circumference at birth                    | 0.17 (±0.93)         | 0.15 (±0.93)        | 0.75 |
| z-score head circumference at expected term ±14 days   | -0.34 (±0.98)        | -0.01 (±1.03)       | 0.07 |
| z-score head circumference with 6 weeks corrected age  | -0.26 (±1.12)        | 0.08 (±1.28)        | 0.48 |
| z-score head circumference with 3 months corrected age | -0.25 (±1.2)         | -0.17 (±1.2)        | 0.14 |
| z-score head circumference with 6 months corrected age | -0.27 (±1.21)        | -0.11 (±1.22)       | 0.38 |
| z-score head circumference with 12 month corrected age | -0.23 (±1.42)        | -0.08 (±1.22)       | 0.25 |
| <b>BMI</b>                                             | ..                   | ..                  | ..   |
| BMI at birth                                           | 7.58 (±1.08)         | 7.5 (±0.97)         | 0.63 |
| BMI at expected term ±14 days                          | 13.47 (±1.16)        | 13.56 (±1.19)       | 0.27 |
| BMI with 6 weeks corrected age                         | 15.28 (±1.47)        | 15.33 (±1.62)       | 0.88 |
| BMI with 3 months corrected age                        | 15.91 (±1.58)        | 15.89 (±1.52)       | 0.95 |
| BMI with 6 months corrected age                        | 16.35 (±1.71)        | 16.25 (±1.64)       | 0.35 |
| BMI with 12 months corrected age                       | 16.72 (±1.94)        | 16.44 (±1.83)       | 0.14 |
| <b>z-score BMI</b>                                     |                      |                     |      |

|                                          |               |               |      |
|------------------------------------------|---------------|---------------|------|
| z-score BMI with 6 weeks corrected age   | -0.22 (±1.05) | -0.12 (±1.12) | 0.37 |
| z-score BMI with 3 months corrected age  | -0.64 (±1.15) | -0.58 (±1.02) | 0.77 |
| z-score BMI with 6 months corrected age  | -0.66 (±1.23) | -0.67 (±1.15) | 0.74 |
| z-score BMI with 12 months corrected age | -0.02 (±1.4)  | -0.18 (±1.39) | 0.35 |

p-values were calculated from mixed models adjusted for sex and gestational age, from Visit 1 additionally adjusted for nutrition at discharge (breastfed, formula, mixed), and from Visit 2 additionally adjusted for the respective baseline value. Data are given in mean (SD); BMI=Body mass index

**Table S3 :** Assessment of interaction effects between nutrition at discharge and treatment group.

| Outcome       | Predictor                         | Estimate | Low      | Up       | p       | P treatment | P interaction |
|---------------|-----------------------------------|----------|----------|----------|---------|-------------|---------------|
| <b>Height</b> | Breastmilk feeding                | 74.313   | 73.085   | 75.542   | <0.0001 | ..          | ..            |
| Height        | Formula feeding                   | 73.920   | 72.818   | 75.022   | <0.0001 | ..          | ..            |
| Height        | Mixed feeding                     | 73.576   | 72.656   | 74.495   | <0.0001 | ..          | ..            |
| Height        | Male sex                          | 0.974    | 0.192    | 1.756    | 0.015   | ..          | ..            |
| Height        | GA in days (mean centered)        | -0.024   | -0.052   | 0.005    | 0.1014  | ..          | ..            |
| Height        | Height at Visit 1 (mean centered) | 0.505    | 0.346    | 0.663    | <0.0001 | ..          | ..            |
| Height        | Breastmilk feeding:Early group    | -0.165   | -1.689   | 1.360    | 0.8311  |             |               |
| Height        | Formula feeding:Early group       | 0.142    | -1.275   | 1.560    | 0.8426  | 0.9425      | 0.873         |
| Height        | Mixed feeding:Early Group         | 0.375    | -0.978   | 1.727    | 0.5842  |             |               |
| Weight        | Breastmilk feeding                | 9125.995 | 8555.656 | 9696.334 | <0.0001 | ..          | ..            |
| Weight        | Formula feeding                   | 9005.821 | 8483.124 | 9528.518 | <0.0001 | ..          | ..            |
| Weight        | Mixed feeding                     | 9296.614 | 8857.435 | 9735.793 | <0.0001 | ..          | ..            |
| Weight        | Male sex                          | -168.651 | -538.467 | 201.165  | 0.369   | ..          | ..            |
| Weight        | GA in days (mean centered)        | -2.104   | -15.745  | 11.537   | 0.7606  | ..          | ..            |
| Weight        | Height at Visit 1 (mean centered) | 1.423    | 0.998    | 1.848    | <0.0001 | ..          | ..            |
| Weight        | Breastmilk feeding: Early group   | 598.784  | -112.452 | 1310.020 | 0.0982  |             |               |
| Weight        | Formula feeding: Early group      | 373.319  | -299.007 | 1045.645 | 0.274   | 0.2716      | 0.39          |
| Weight        | Mixed feeding: Early Group        | -53.531  | -697.118 | 590.057  | 0.8694  |             |               |
| Head-CF       | Breastmilk feeding                | 45.397   | 44.717   | 46.077   | <0.0001 | ..          | ..            |
| Head-CF       | Formula feeding                   | 44.827   | 44.228   | 45.426   | <0.0001 | ..          | ..            |
| Head-CF       | Mixed feeding                     | 45.463   | 44.964   | 45.961   | <0.0001 | ..          | ..            |
| Head-CF       | Male sex                          | 0.048    | -0.373   | 0.469    | 0.8221  | ..          | ..            |
| Head-CF       | GA in days (mean centered)        | 0.010    | -0.006   | 0.025    | 0.2322  | ..          | ..            |
| Head-CF       | Height at Visit 1 (mean centered) | 0.589    | 0.445    | 0.732    | <0.0001 | ..          | ..            |
| Head-CF       | Breastmilk feeding: Early group   | 0.061    | -0.788   | 0.909    | 0.8876  |             |               |
| Head-CF       | Formula feeding: Early group      | 0.073    | -0.706   | 0.853    | 0.853   | 0.9597      | 0.9689        |
| Head-CF       | Mixed feeding: Early Group        | 0.186    | -0.553   | 0.924    | 0.6193  |             |               |
| BMI           | Breastmilk feeding                | 16.453   | 15.576   | 17.331   | <0.0001 | ..          | ..            |
| BMI           | Formula feeding                   | 16.491   | 15.706   | 17.277   | <0.0001 | ..          | ..            |
| BMI           | Mixed feeding                     | 17.053   | 16.397   | 17.710   | <0.0001 | ..          | ..            |
| BMI           | Male sex                          | -0.705   | -1.269   | -0.141   | 0.0147  | ..          | ..            |
| BMI           | GA in days (mean centered)        | 0.009    | -0.011   | 0.030    | 0.3694  | ..          | ..            |
| BMI           | Height at Visit 1 (mean centered) | 0.685    | 0.445    | 0.925    | <0.0001 | ..          | ..            |
| BMI           | Breastmilk feeding: Early group   | 1.040    | -0.045   | 2.125    | 0.0601  |             |               |
| BMI           | Formula feeding: Early group      | 0.522    | -0.488   | 1.532    | 0.3082  | 0.2026      | 0.2884        |
| BMI           | Mixed feeding: Early Group        | -0.109   | -1.074   | 0.856    | 0.8237  |             |               |

Estimates were calculated from mixed models explaining the respective outcome at Visit 5 (12 months of age corrected for term) through study group (early vs. late introduction of complementary feeding), the baseline body height obtained at Visit 1 (at term), nutrition at discharge (three categories breastmilk, formula, mixed feeding), gestational age at birth, and sex. A random intercept was included to account for possible correlation between siblings of multiple births. Gestational age and height at Visit 1 were mean centered to facilitate the interpretation of estimated model coefficients. Thus, estimates for breastmilk feeding, formula feeding, and mixed correspond to the estimated mean outcome for patients of female sex in the late group with an average gestational age and average height at Visit 1. Interaction terms are denoted by a colon. The estimates for interaction terms correspond to the estimated difference between early and late introduction of solids in the three different types of nutrition at discharge. Estimates are supported by lower and upper bounds of 95% confidence intervals (columns "Low" and "up"). The p values in the column "p treatment" refer to the null hypothesis that there is no effect of early versus late treatment group in any nutrition at discharge group. The p values in the column "p interaction" refer to the null hypothesis that there is no interaction (i.e. that the difference between early and late group is the same for all nutrition at discharge groups). GA=gestational age, BM=Breastmilk, Head-CF=Head-Circumference, BMI=Body mass index
